# Supplementary material for: An in situ grown ultrathin and robust protein nanocoating for mitigating thromboembolic issues associated with cardiovascular medical devices
Source: Royal Society of Chemistry journal article supplement (doi:10.1039/d3bm01188g), 2023-01-01
Supplement: d3bm01188g1.pdf [file d3bm01188g1.pdf]

*Supplementary Information*

In situ grown ultrathin and robust protein nanocoating for mitigating thromboembolic in cardiovascular medical devices

Bianliang Miao,<sup>a</sup> Yi Liu,<sup>a</sup> Along Zhang,<sup>b</sup> Ye Cao,<sup>b</sup> Rui Zhong,<sup>b</sup> Jiaxin Liu<sup>b</sup> and Zhengzhong Shao<sup>\*a</sup>

<sup>a</sup>State Key Laboratory of Molecular Engineering of Polymers, Advanced Material Laboratory, Department of Macromolecular Science, Fudan University, Shanghai 200433, China.

<sup>b</sup>Institute of Blood Transfusion, Chinese Academy of Medical Sciences & Peking Union Medical College, Chengdu 610052, China.

\*Corresponding author. Email: zzshao@fudan.edu.cn

## Supplementary Figures

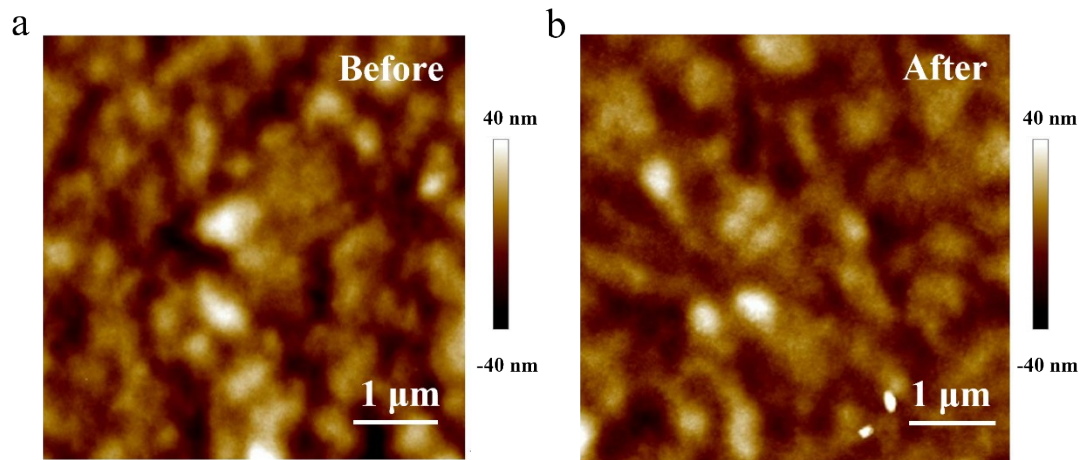

**Fig. S1** AFM images of SF/Ly nanocoating on silicon wafer (a) before and (b) after treatment by ultrasound (100 W, 30 min) in water.

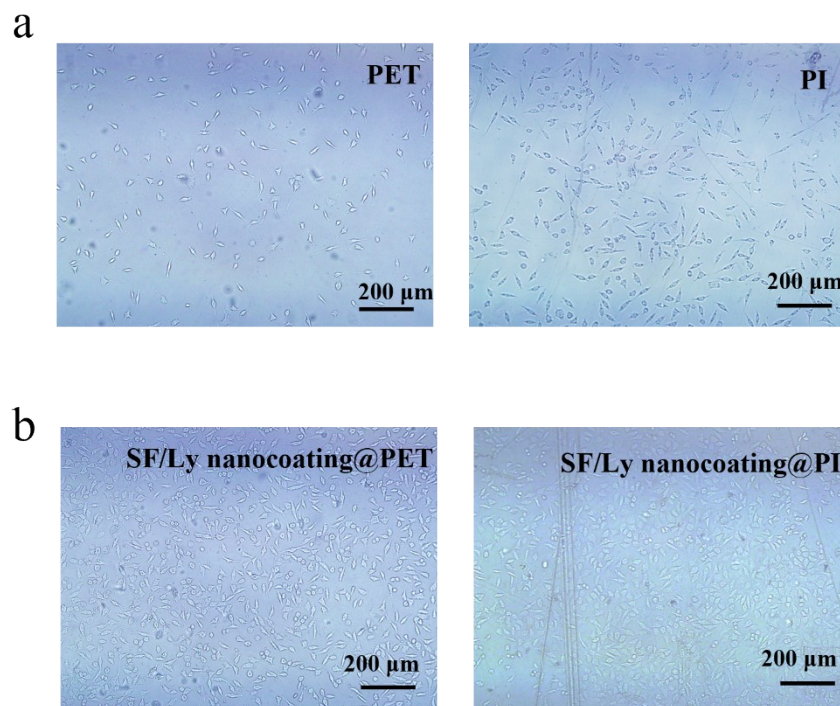

**Fig. S2** Fluorescence images of L929-laden (a) original substrates and (b) SF/Ly nanocoating@substrates after 48 h of culturing. Cells were stained using a live/dead viability/cytotoxicity kit.

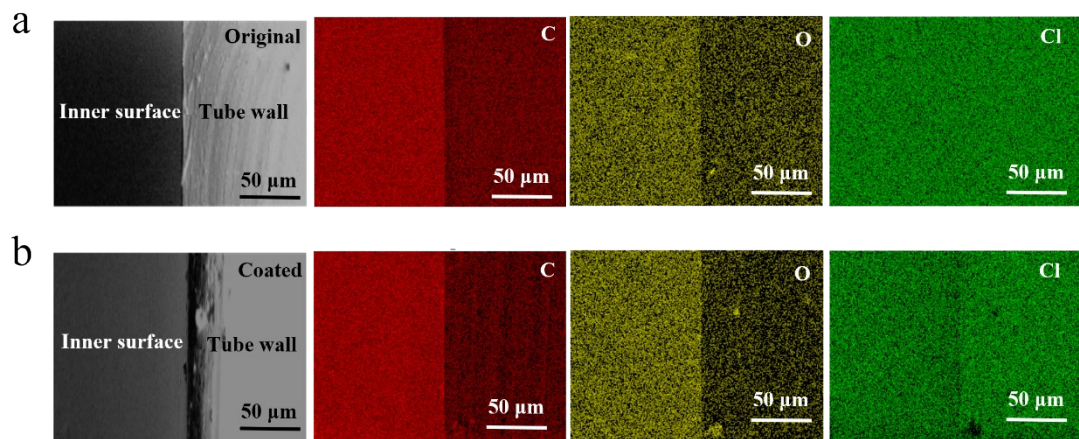

**Fig. S3** SEM images and corresponding EDS mapping images of (a) PVC tube and (b) SF/Ly nanocoating@PVC tube.

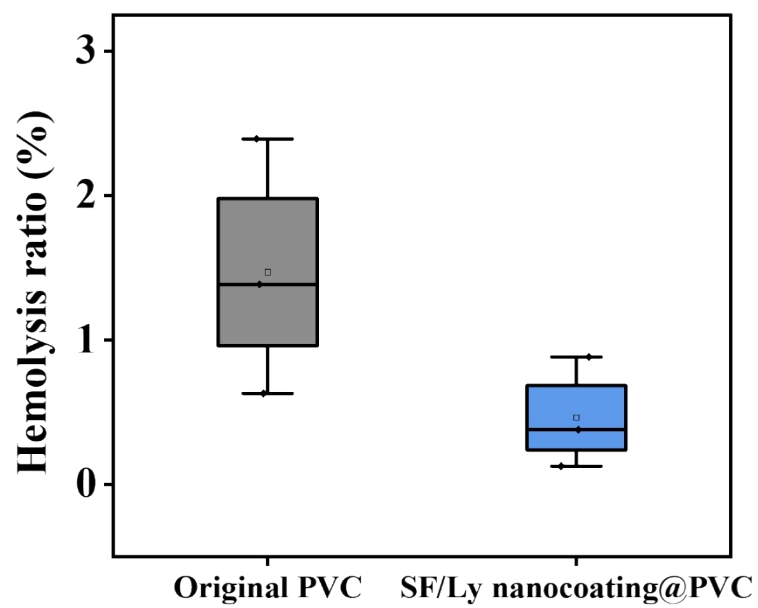

**Fig. S4** Hemolytic assay of PVC and SF/Ly nanocoating@PVC.

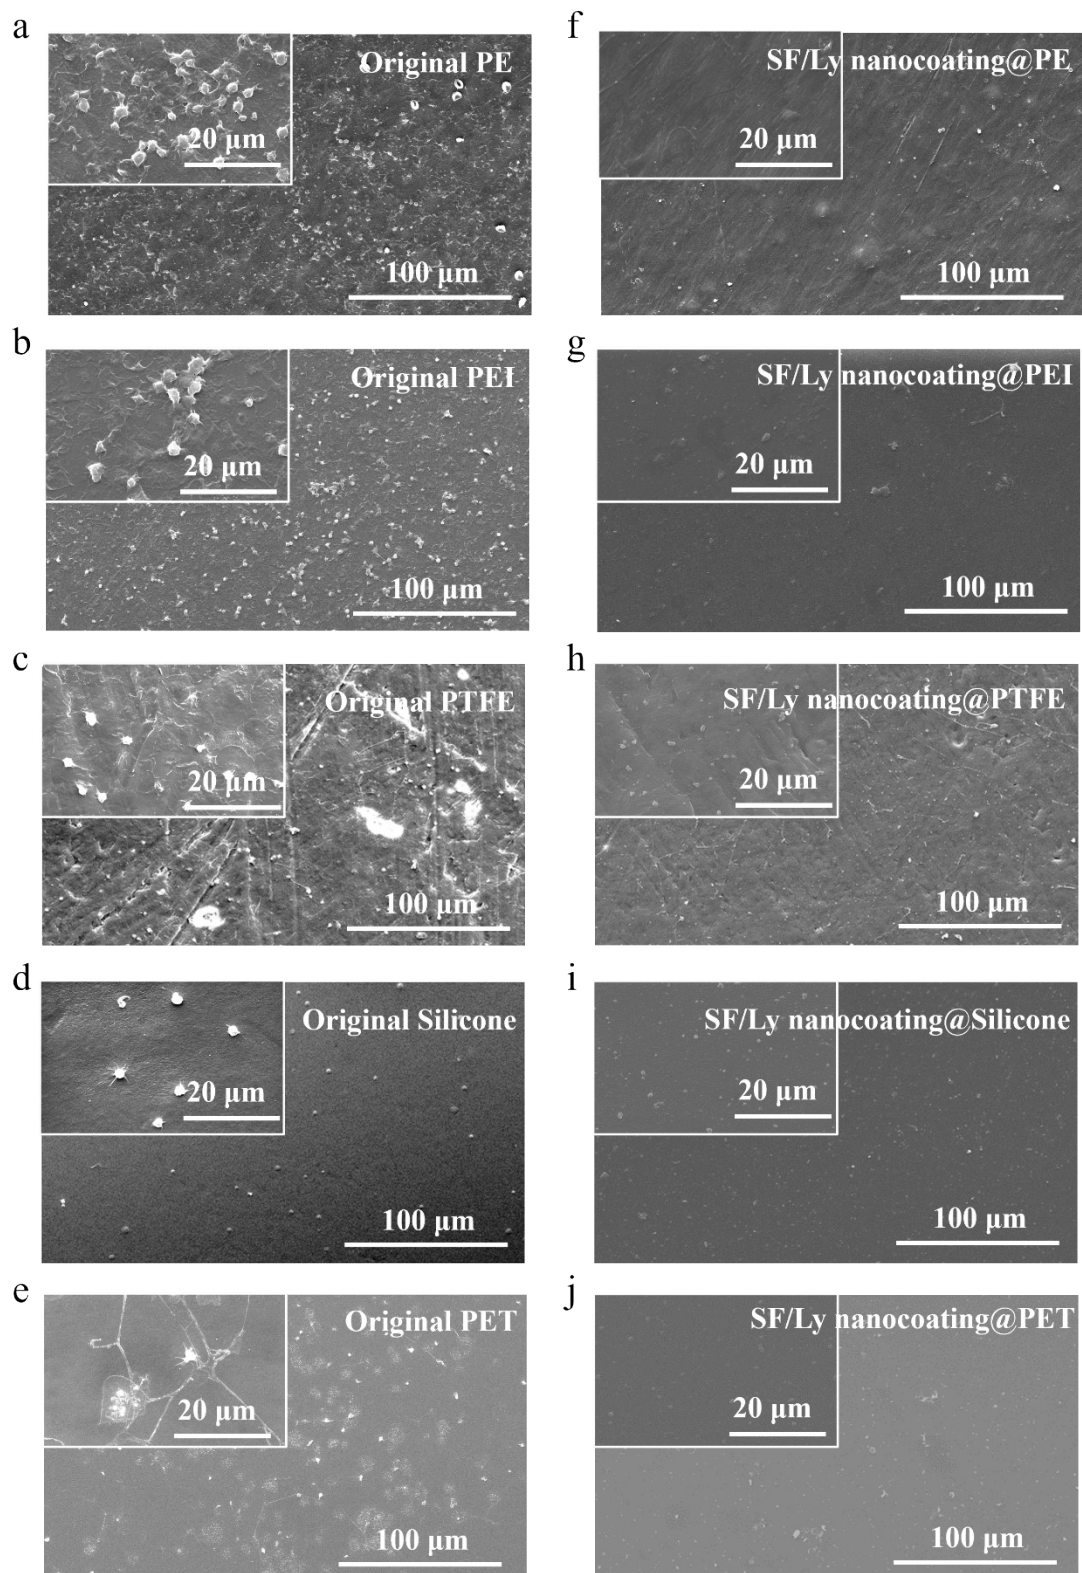

**Fig. S5** SEM images of (a-e) original substrates and (f-j) SF/Ly nanocoating@substrates adhered platelets *in vitro*.

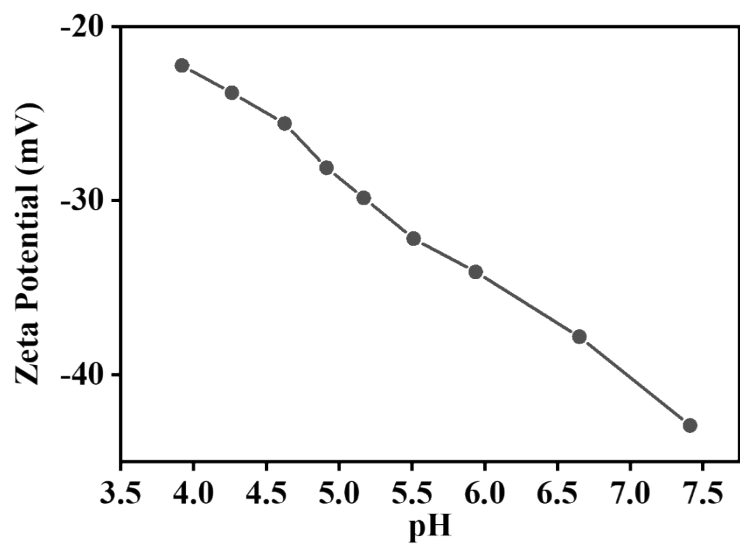

Fig. S6 Surface zeta potential of SF/Ly nanocoating with different pH.

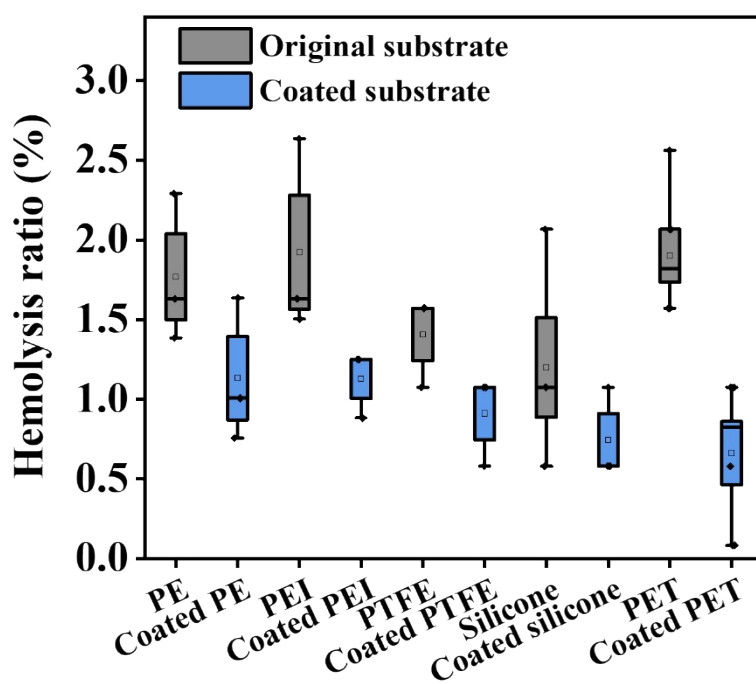

Fig. S7 Hemolytic assay of various substrates and SF/Ly nanocoating@substrates.
